# Supplementary material for: Rational design and synthesis of a porous, task-specific polycarbazole for efficient CO2 capture
Source: Royal Society of Chemistry journal article supplement (doi:10.1039/c6cc00573j), 2016-01-01
Supplement: c6cc00573j1.pdf [file c6cc00573j1.pdf]

## Electronic Supplementary Information (ESI)

### Rational Design and Synthesis of a Porous, Task-Specific Polycarbazole for Efficient CO<sub>2</sub> Capture

Tian Jin,<sup>a,†</sup> Yan Xiong,<sup>a,†</sup> Xiang Zhu,<sup>\*,b</sup> Ziqi Tian,<sup>c</sup> Duan-Jian Tao,<sup>b</sup> Jun Hu,<sup>a</sup> De-en Jiang,<sup>c</sup>

Hualin Wang,<sup>d</sup> Honglai Liu<sup>\*,a</sup> and Sheng Dai<sup>\*,b</sup>

<sup>a</sup>State Key Laboratory of Chemical Engineering and Department of Chemistry, East China University of Science and Technology, Shanghai, 200237, P. R. China.

Email: [hliu@ecust.edu.cn](mailto:hliu@ecust.edu.cn)

<sup>b</sup>Department of Chemistry, The University of Tennessee, Knoxville, Tennessee 37996-1600, United States.

Email: [xiang@utk.edu](mailto:xiang@utk.edu) ([zhuxiang.ecust@gmail.com](mailto:zhuxiang.ecust@gmail.com)),

[dais@ornl.gov](mailto:dais@ornl.gov).

<sup>c</sup> Department of Chemistry, University of California, Riverside, CA 92521, United States

<sup>d</sup> State Environmental Protection Key Laboratory of Environmental Risk Assessment and Control on Chemical Process, East China University of Science and Technology, Shanghai 200237, China

<sup>†</sup> These authors contributed equally.

## Chemicals:

All commercially available solvents and other chemicals were purchased from local suppliers and used without further purification. 3,5,6-tetrafluoropyridine (96 %) was obtained from TCI. Carbazole (98 %) was purchased from Adamas reagent Co., Ltd. Potassium carbonate (99 %) was obtained from Shanghai Lingfeng Chemistry Reagents Co., Ltd. Anhydrous ferric chloride (97 %) was purchased from Sinopharm Chemical Reagent Co., Ltd.

**Material characterization:** The morphology of the sample was characterized by using a JEOL JEM-2100 transmission electron microscopy (TEM). The powder X-ray diffraction (PXRD) data were carried out on a D/Max2550 VB/PC diffractometer (40 kV, 200 mA) using a Cu K $\alpha$  as the radiation. The FT-IR spectra were recorded on a Nicolet iS10 FTIR spectrometer using the KBr pellet technique. Gas adsorption/desorption isotherm was measured by volumetric adsorption analyzer ASAP 2020 after the sample was degassed at 150 °C for 12 h under vacuum. Brunauer-Emmett-Teller (BET) and t-plot model were used to determine the specific surface area and t-plot micropore area of the samples, respectively. The total pore volume of the sample was estimated at a relative pressure of  $P/P_0 = 0.99$ . Pore size distributions (PSD) was calculated using nonlocal density functional theory (NLDFT). CO<sub>2</sub> adsorption isotherm was measured up to 1 atm at 273 and 298 K. The thermal decomposition behavior of the sample was performed on a NETZSCH STA 499 F3 thermogravimetric analyzer, and the sample was heated at a rate of 10 °C min<sup>-1</sup> under N<sub>2</sub> gas flow at a rate of 40 mL min<sup>-1</sup>. Elemental analysis was conducted on an elemental analyzer (Vario EL III). Solution <sup>1</sup>H nuclear magnetic resonance (NMR) spectrum was obtained in a CDCl<sub>3</sub> solution with a Bruker 400MHz Advance spectrometer. Solid state <sup>13</sup>C cross-polarization (CP)/magic-angle spinning (MAS) NMR spectrum was recorded with a Bruker Avance III- 600MHz spectrometer at a frequency of 100.62 MHz with 13 kHz spinning rate, and 1024 scans were signal averaged. The chemical shifts of <sup>13</sup>C NMR spectra were referenced to tetramethylsilane. Water contact angle measurement was carried out on JC2000D optical contact angle meter at ambient conditions.

## CO<sub>2</sub>/N<sub>2</sub> Uptake

CO<sub>2</sub> and N<sub>2</sub> adsorption isotherms of samples were measured using a Micromeritics ASAP 2020 static volumetric analyzer at two different temperatures 273 and 298 K. Prior to each adsorption experiment, the samples were degassed for 12 h at 120 °C. The circulator was used to keep the temperature constant during adsorption analysis. Isothermic heats of adsorption ( $Q_{st}$ ) values were calculated by using the standard calculation routine, which is the Clausius-Clapeyron equation, in the data master offline data reduction software

(Micrometrics). The CO<sub>2</sub>/N<sub>2</sub> selectivity by initial slope method was estimated from the ratio of the initial slopes in the Henry region of the adsorption isotherms. The CO<sub>2</sub>/N<sub>2</sub> selectivity by Ideal Adsorbed Solution Theory (IAST) was calculated as follows:

The pure component isotherms of CO<sub>2</sub> measured at 273 and 298 K were fitted with the single-site Langmuir (SSL) model:

$$q_i = q_{i,sat} \times \frac{b_i p_i}{1 + b_i p_i}$$

Where,  $b_i$  is the parameter in the pure component Langmuir isotherm (Pa<sup>-1</sup>),  $p_i$  is bulk gas phase pressure of species  $i$  (Pa),  $p_t$  is total bulk gas phase pressure of mixture (Pa),  $q_i$  is molar loading of species  $i$  (mol kg<sup>-1</sup>),  $q_{i,sat}$  is saturation capacity of species  $i$  (mol kg<sup>-1</sup>). Pure component isotherm fitting parameters were then used for calculating IAST binary gas adsorption selectivities,  $S_{ads}$ , defined as:

$$S_{ads} = \frac{q_1/q_2}{p_1/p_2}$$

The IAST calculations were carried out for binary mixture containing 15 % CO<sub>2</sub> and 85 % N<sub>2</sub>, which is typical of flue gases.

## Synthetic Section

**Synthesis of 9,9',9''-(pyridine-2,4,6-triyl)tris(9H-carbazole) (2,4,6-CzPy)<sup>1</sup>:** A mixture of 2,4,6-trifluoropyridine (350 mg, 2.6 mmol), carbazole (1.44 g, 8.6 mmol) and K<sub>2</sub>CO<sub>3</sub> (3.3 g, 23.4 mmol) in dimethyl sulfoxide (DMSO) (10 mL) was stirred at 150 °C for 12 h under argon atmosphere. After cooling to room temperature, the mixture was poured into water, filtered, and then purified by column chromatography over silica gel with trichloromethane/petroleum as the eluent to afford a white solid. Yield: 90 %. The <sup>1</sup>H NMR spectrum of 2,4,6-CzPy was shown in Fig. S10.

**Synthesis of Task-Specific Porous P-PCz:** Under argon protection, 2,4,6-CzPy (57 mg, 0.1 mmol) was dissolved in anhydrous dichloromethane (9 mL). The solution was subsequently added dropwise to a mixture of anhydrous FeCl<sub>3</sub> (286 mg, 1.76 mmol) and anhydrous dichloromethane (11.8 mL). The resulting mixture was kept stirring under Ar gas flow for 24 h at room temperature. Methanol (20 mL) was then added and stirred for another 1 h to quench the reaction. The obtained polymer was washed with 30 % ammonium hydroxide for 1 h, filtered and washed with water and methanol. The solid was further

purified using Soxhlet extraction with methanol for 24 h and then with tetrahydrofuran for another 24 h. Finally, the desired polymer was collected and dried in a vacuum oven at 80 °C overnight. Yield: 96 %.

## Figures:

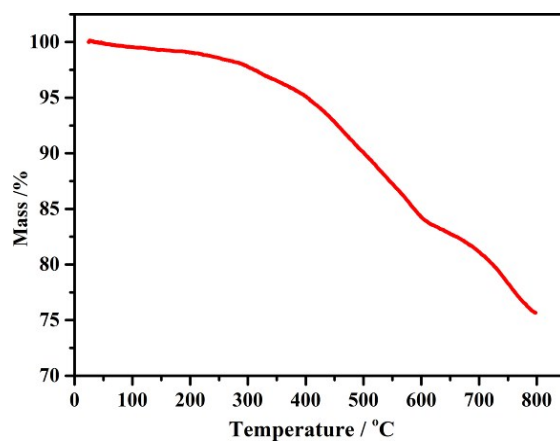

**Fig. S1.** Thermogravimetric analysis of P-PCz.

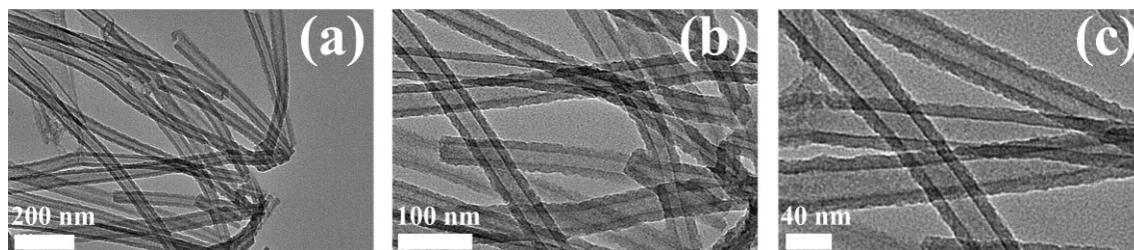

**Fig. S2.** TEM images of P-PCz.

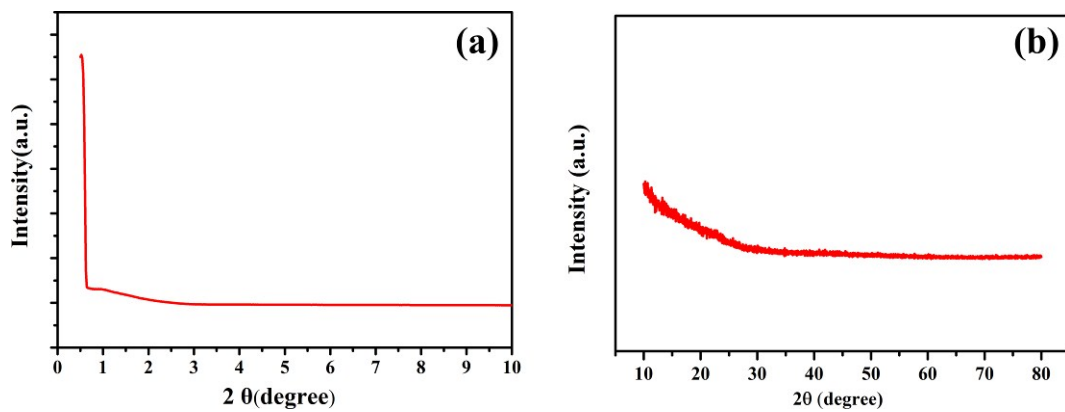

**Fig. S3.** Low-angle (a) and wide-angle (b) XRD patterns of **P-PCz**.

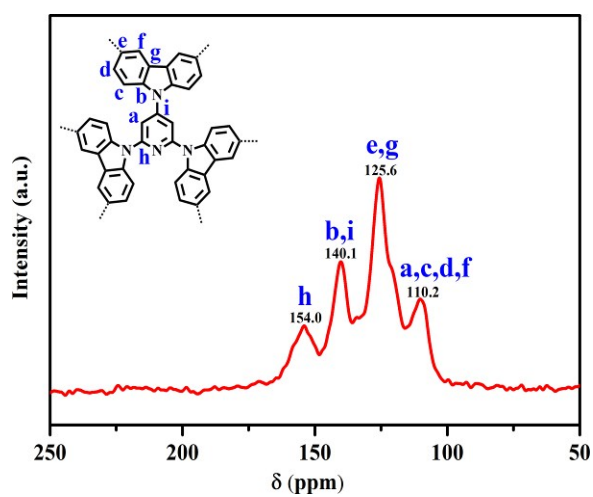

**Fig. S4.**  $^1\text{H} \rightarrow ^{13}\text{C}$  CP/MAS NMR spectra of **P-PCz**.

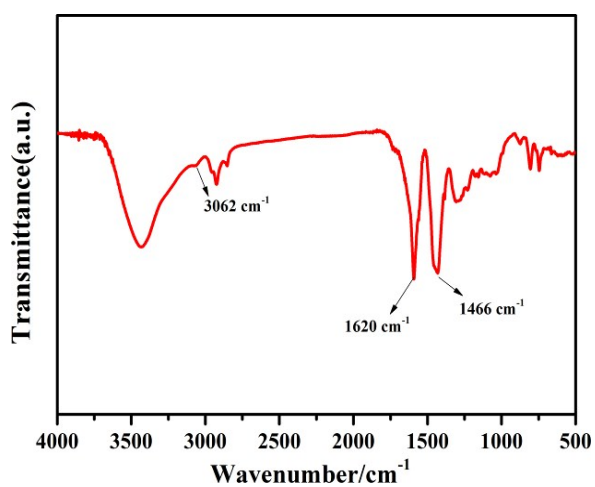

**Fig. S5.** FT-IR spectrum of **P-PCz**.

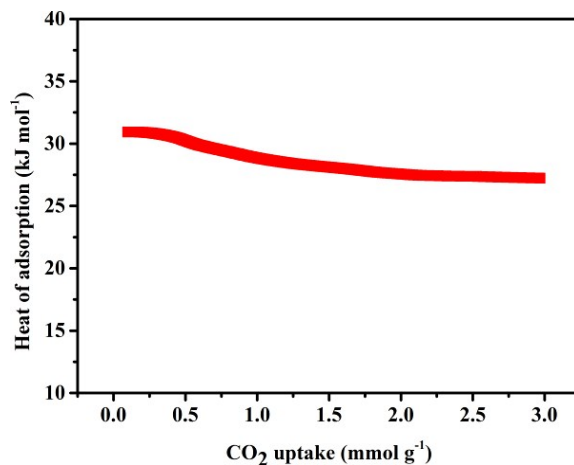

**Fig. S6.** The isosteric heat of adsorption for **P-PCz**.

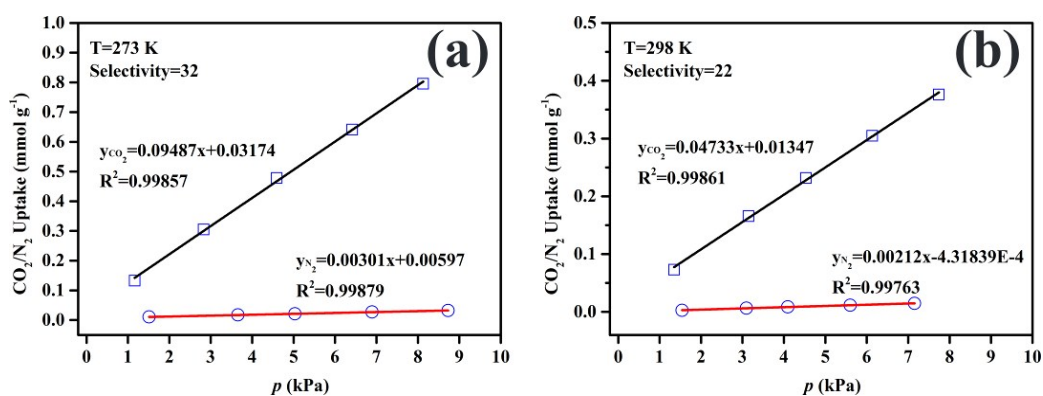

**Fig. S7.** The selectivity of **P-PCz** for  $\text{CO}_2$  over  $\text{N}_2$  isotherms obtained from the initial slope method at 273 K (a) and 298 K (b), respectively.

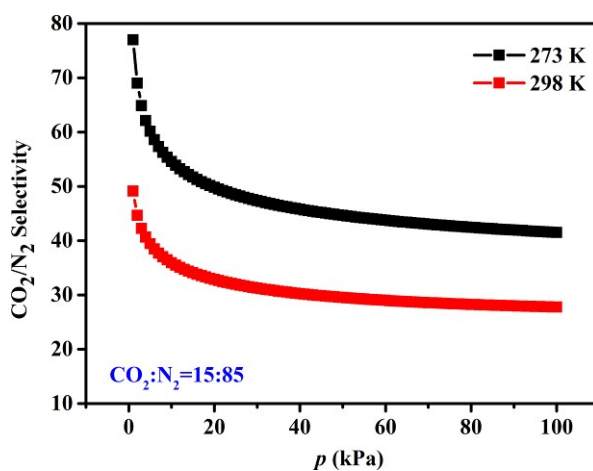

**Fig. S8.** The selectivity of **P-PCz** for  $\text{CO}_2$  over  $\text{N}_2$  isotherms obtained from the IAST method at 273 K and 298 K, respectively.

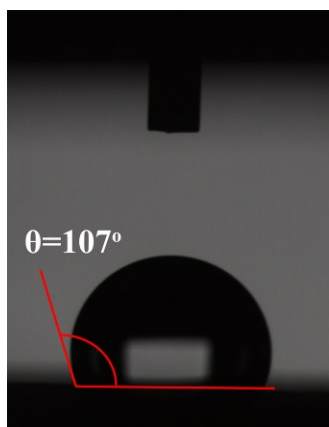

**Fig. S9.** Digital photograph of **P-PCz** after a drop of water was placed onto the sample.

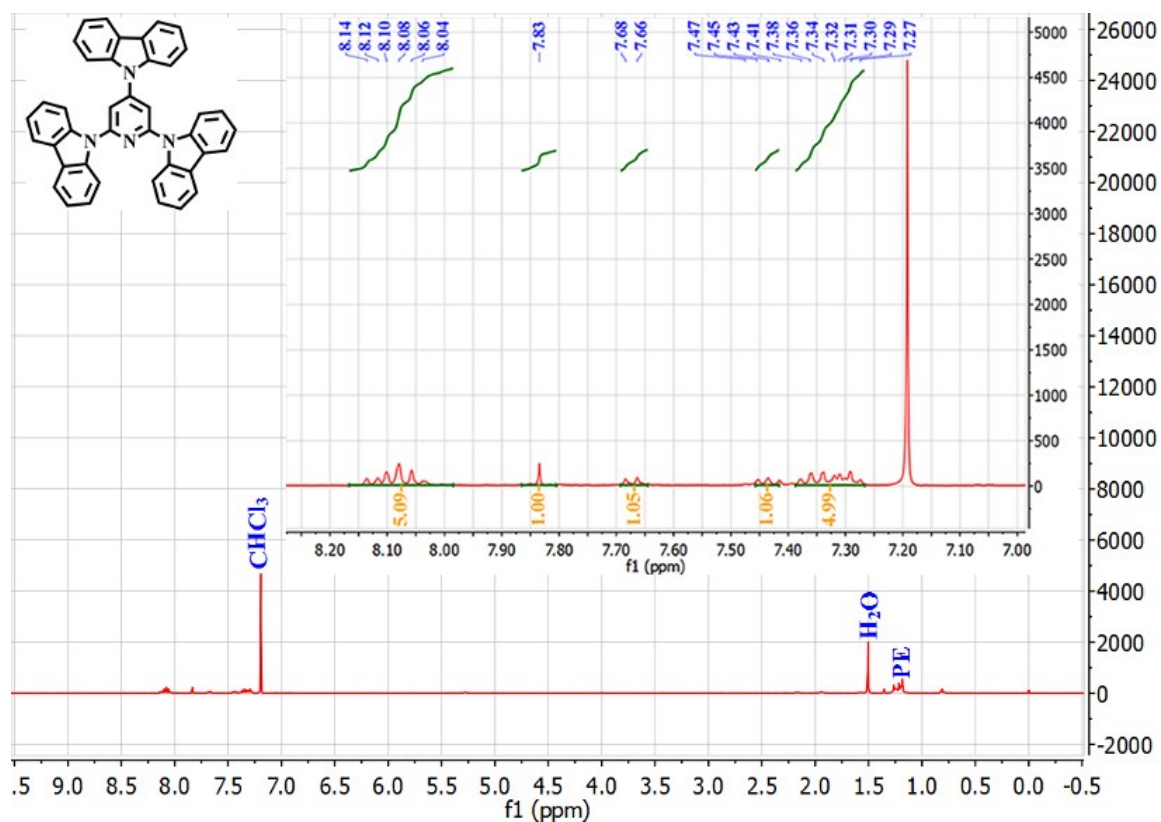

**Table S1.** Summary of surface area, CO<sub>2</sub> uptake, and selectivity (CO<sub>2</sub>/N<sub>2</sub>) at 273 K in selected POPs.

| Adsorbents   | BET surface area<br>(m <sup>2</sup> /g) | CO <sub>2</sub> uptake<br>(mmol/g) | Selectivity by initial<br>slope method | Ref              |
|--------------|-----------------------------------------|------------------------------------|----------------------------------------|------------------|
| <b>P-PCz</b> | <b>1647</b>                             | <b>5.57</b>                        | <b>32</b>                              | <b>This work</b> |
| CPOP-1       | 2220                                    | 4.82                               | 25                                     | 2                |
| CPOP-2       | 510                                     | 1.77                               | — <sup>a</sup>                         | 3                |
| CPOP-3       | 630                                     | 1.91                               | —                                      | 3                |
| CPOP-4       | 660                                     | 2.05                               | —                                      | 3                |
| CPOP-5       | 1050                                    | 2.68                               | —                                      | 3                |
| CPOP-6       | 980                                     | 2.61                               | —                                      | 3                |
| CPOP-7       | 1430                                    | 3.00                               | 30 (ideal)                             | 3                |
| CPOP-8       | 1610                                    | 3.75                               | —                                      | 4                |
| CPOP-9       | 2440                                    | 4.14                               | —                                      | 4                |
| CPOP-10      | 1110                                    | 3.36                               | —                                      | 4                |
| Cz-POP-1     | 2065                                    | 4.59                               | 19                                     | 5                |
| Cz-POP-2     | 671                                     | 1.75                               | 26                                     | 5                |
| Cz-POP-3     | 1927                                    | 4.77                               | 23                                     | 5                |
| Cz-POP-4     | 914                                     | 2.75                               | 37                                     | 5                |
| Py-1         | 437                                     | 2.70                               | 117                                    | 6                |
| azo-COP-2    | 729                                     | 2.56                               | 109.6                                  | 7                |
| ALP-1        | 1235                                    | 5.37                               | 35                                     | 8                |
| FCTF-1-600   | 1535                                    | 5.53                               | 19 (IAST)                              | 9                |
| TSP-1        | 562.5                                   | 3.0                                | 32                                     | 10               |
| TSP-2        | 913.0                                   | 4.1                                | 38                                     | 10               |
| bipy-CTF600  | 2479                                    | 5.58                               | 37                                     | 11               |
| BILP-4       | 1135                                    | 5.34                               | 79                                     | 12               |

<sup>a</sup> not determined



## Reference:

- (1) Tang, C.; Bi, R.; Tao, Y.; Wang, F.; Cao, X.; Wang, S.; Jiang, T.; Zhong, C.; Zhang, H.; Huang, W. *Chem. Commun.* 2015, **51**, 1650.
- (2) Chen, Q.; Luo, M.; Hammershøj, P.; Zhou, D.; Han, Y.; Laursen, B. W.; Yan, C.-G. Han, B.-H., *J. Am. Chem. Soc.*, 2012, **134**, 6084.
- (3) Chen, Q.; Liu, D.-P.; Luo, M.; Feng, L.-J.; Zhao, Y.-C. Han, B.-H., *Small*, 2014, **10**, 308.
- (4) Chen, Q.; Liu, D.-P.; Zhu, J.-H. Han, B.-H., *Macromolecules*, 2014, **47**, 5926.
- (5) Zhang, X.; Lu, J. Zhang, J., *Chem. Mater.*, 2014, **26**, 4023.
- (6) Luo, Y.; Li, B.; Wang, W.; Wu, K. Tan, B., *Adv. Mater.*, 2012, **24**, 5703.
- (7) Patel, H. A.; Je, S. H.; Park, J.; Chen, D. P.; Jung, Y.; Yavuz, C. T. Coskun, A., *Nat. Commun.*, 2013, **4**, 1357.
- (8) Arab, P.; Rabbani, M. G.; Sekizkardes, A. K.; İslamoğlu, T. El-Kaderi, H. M., *Chem. Mater.*, 2014, **26**, 1385.
- (9) Zhao, Y.; Yao, K. X.; Teng, B.; Zhang, T. Han, Y., *Energy Environ. Sci.*, 2013, **6**, 3684.
- (10) Zhu, X.; Mahurin, S. M.; An, S.-H.; Do-Thanh, C.-L.; Tian, C.; Li, Y.; Gill, L. W.; Hagaman, E. W.; Bian, Z.; Zhou, J.-H.; Hu, J.; Liu, H. Dai, S., *Chem. Commun.*, 2014, **50**, 7933.
- (11) S. Hug, L. Stegbauer, H. Oh, M. Hirscher and B. V. Lotsch, *Chem. Mater.*, 2015, **27**, 8001
- (12) Rabbani, M. G.; El-Kaderi, H. M., *Chem. Mater.*, 2012, **24**, 1511.
